# Supplementary material for: Economic Evaluation of Healthcare Resource Utilization and Costs for Newly Diagnosed Dementia-Related Psychosis
Source: MDPI journal article supplement (doi:10.3390/geriatrics7020029), 2022-03-08
Supplement: s1 [file s1]

# Healthcare resource utilization and costs for newly diagnosed dementia-related psychosis

## Supplement

**Table S1.** ICD (9<sup>th</sup> and 10<sup>th</sup> Revisions) Clinical Modification Codes for Dementia.

| Dementia Type                           | Dementia Diagnosis Codes                                                                             |
|-----------------------------------------|------------------------------------------------------------------------------------------------------|
| Alzheimer's disease and senile dementia | ICD 9: 331.0, 290.0, 290.10, 290.13, 290.21, 797, 331.2<br>ICD 10: G30.0, G30.1, G30.8, G30.9, G31.1 |
| Parkinson's disease dementia            | ICD 9: 332<br>ICD 10: G20                                                                            |
| Lewy body dementia                      | ICD 9: 331.82<br>ICD 10: G31.83                                                                      |
| Frontotemporal dementia                 | ICD 9: 331.19, 331.11<br>ICD 10: G31.09, G31.01                                                      |
| Vascular dementia                       | ICD 9: 290.40, 290.43, 438.0<br>ICD 10: F01.50                                                       |
| Other/unspecified dementia              | ICD 9: 294.10, 294.20<br>ICD 10: F03.90, F02.80                                                      |

Abbreviation: ICD=International Classification of Diseases.

**Table S2.** ICD (9<sup>th</sup> and 10<sup>th</sup> Revisions) Clinical Modification Codes Used to Define Exclusions for Conditions Potentially Associated with Psychosis.

| Exclusions                                 | Diagnosis Codes                                                                                                                                                                                                                                                                                                                                                                                                                                                                                                                                                                                                                                                                                                                                                                                                                                                                                                  |
|--------------------------------------------|------------------------------------------------------------------------------------------------------------------------------------------------------------------------------------------------------------------------------------------------------------------------------------------------------------------------------------------------------------------------------------------------------------------------------------------------------------------------------------------------------------------------------------------------------------------------------------------------------------------------------------------------------------------------------------------------------------------------------------------------------------------------------------------------------------------------------------------------------------------------------------------------------------------|
| Chronic psychiatric disease                | ICD 9: 295, 296, 297, 298.3, 293.83, 293.84, 301.20, 301.22, 291.1, 291.2, 291.3, 291.5, 292.11, 292.12, 292.82, 293.81, 293.82                                                                                                                                                                                                                                                                                                                                                                                                                                                                                                                                                                                                                                                                                                                                                                                  |
|                                            | ICD 10: F20, F21, F24, F25, F30, F31, F32.3, F33.3, V11.0, F1015, F10232, F10250, F10251, F10259, F10950, F10951, F10959, F11122, F11150, F11151, F11159, F11222, F11250, F11251, F11259, F11922, F11950, F11951, F11959, F12122, F12150, F12151, F12159, F12222, F12250, F12251, F12259, F12922, F12950, F12951, F12959, F13150, F13151, F13159, F13232, F13250, F13251, F13259, F13932, F13950, F13951, F13959, F14122, F14150, F14151, F14159, F14222, F14250, F14251, F14259, F14922, F14950, F14951, F14959, F15122, F15150, F15151, F15159, F15222, F15250, F15251, F15259, F15922, F15950, F15951, F15959, F16122, F16150, F16151, F16159, F16183, F16250, F16251, F16259, F16283, F16950, F16951, F16959, F16983, F18150, F18151, F18159, F18250, F18251, F18259, F18950, F18951, F18959, F19122, F19150, F19151, F19159, F19222, F19232, F19250, F19251, F19259, F19922, F19932, F19950, F19951, F19959 |
| Seizures                                   | ICD 9: 345, 310, 333.2, 649.4, 780.33, 300.11, 780.39, 341.81, 333.2                                                                                                                                                                                                                                                                                                                                                                                                                                                                                                                                                                                                                                                                                                                                                                                                                                             |
|                                            | ICD 10: F482, G25.3, R56.1, G40, F44.5, R56.9, G93.81, G83.84, G25.3                                                                                                                                                                                                                                                                                                                                                                                                                                                                                                                                                                                                                                                                                                                                                                                                                                             |
| Chronic alcohol-induced dementia           | ICD 9: 291.2<br>ICD 10: F10.27, G312                                                                                                                                                                                                                                                                                                                                                                                                                                                                                                                                                                                                                                                                                                                                                                                                                                                                             |
| Drug-induced persisting dementia           | ICD 9: 292.82<br>ICD 10: F19.97                                                                                                                                                                                                                                                                                                                                                                                                                                                                                                                                                                                                                                                                                                                                                                                                                                                                                  |
| Ischemic, hemorrhagic, other stroke        | ICD 9: 430, 431, 432.0, .1, .9 433.x1, 434.x1<br>ICD 10: I60.X, I61.X, I62.X, I63.X, I64, I67.X, I69.X except I69.310                                                                                                                                                                                                                                                                                                                                                                                                                                                                                                                                                                                                                                                                                                                                                                                            |
| Cerebral amyloid angiopathy                | ICD 10: I68.0                                                                                                                                                                                                                                                                                                                                                                                                                                                                                                                                                                                                                                                                                                                                                                                                                                                                                                    |
| Central nervous system neoplasm malignancy | ICD 9: 191.X, 192.1, 239.6, 198.3, 225.0, 225.2<br>ICD 10: C70.0, .9, C71.X, C72.9, C721, C7931, C7932, D33.0,.1, 2, .7, .9 D32.0, .9, D49.6                                                                                                                                                                                                                                                                                                                                                                                                                                                                                                                                                                                                                                                                                                                                                                     |
| Huntington disease                         | ICD 10: G10                                                                                                                                                                                                                                                                                                                                                                                                                                                                                                                                                                                                                                                                                                                                                                                                                                                                                                      |
| Vascular malformation                      | ICD 9: 747.81<br>ICD 10: Q28.2, 28.3                                                                                                                                                                                                                                                                                                                                                                                                                                                                                                                                                                                                                                                                                                                                                                                                                                                                             |
| Other                                      | ICD 9: 331.7, 331.81, 331.89, 437.1, 198.3, 192.8, 192.9<br>ICD 10: G13.2, G13.8, G93.7, G31.89, G31.9, G46                                                                                                                                                                                                                                                                                                                                                                                                                                                                                                                                                                                                                                                                                                                                                                                                      |

Abbreviation: ICD=International Classification of Diseases.

**Table S3.** ICD (9<sup>th</sup> and 10<sup>th</sup> Revisions) Clinical Modification Codes for Manifestations of Psychosis Used to Establish the Presence of Dementia-Related Psychosis.

| Disease Manifestation | Psychosis Diagnosis Codes                                                                                            |
|-----------------------|----------------------------------------------------------------------------------------------------------------------|
| Psychosis             | ICD 9: 293.81, 293.82, 290.8, 290.9, 297.1, 298.0, 298.1, 298.4, 298.8, 298.9, 368.16, 780.1, 290.12, 290.20, 290.42 |
|                       | ICD 10: F06.2, F06.0, F22, F23, F28, F29, H53.16, R44.0, R44.1, R44.2, R44.3                                         |

Abbreviation: ICD=International Classification of Diseases.

**Table S4.** Annualized All-cause Weighted HCRU Claims Per Patient Per Year for Patients With Dementia-related Psychosis.

|                         | Sample<br>Size, N | Inpatient | Emergency<br>Department/<br>Observation<br>Stay | Outpatient <sup>1</sup> | Skilled<br>Nursing Fa-<br>cility | Home Health<br>Care/ Hos-<br>pice | Physician<br>Visits/DME | Prescription<br>Drug Fills |
|-------------------------|-------------------|-----------|-------------------------------------------------|-------------------------|----------------------------------|-----------------------------------|-------------------------|----------------------------|
| Baseline period         | 49,509            | 1.0       | 1.2                                             | 5.6                     | 1.2                              | 1.1                               | 26.7                    | 63.0                       |
| 1 year post index       | 49,509            | 0.9       | 1.1                                             | 6.5                     | 1.4                              | 2.0                               | 30.8                    | 79.2                       |
| 2 years post in-<br>dex | 26,808            | 0.6       | 0.8                                             | 5.8                     | 0.9                              | 1.9                               | 26.0                    | 79.3                       |
| 3 years post in-<br>dex | 16,027            | 0.6       | 0.7                                             | 5.6                     | 0.8                              | 1.9                               | 24.8                    | 78.9                       |
| 4 years post in-<br>dex | 9277              | 0.5       | 0.6                                             | 5.4                     | 0.7                              | 1.8                               | 23.8                    | 78.5                       |

Weighted mean values are shown. <sup>1</sup> Outpatient setting does not include emergency department or observation hospital stays. Abbreviation: DME=durable medical equipment; LTC=long-term care; SD=standard deviation.

**Table S5.** All-cause Costs Per patient Per Year by Type of Medicare Setting and Overall in Medicare and LTC.

|                         | Sample<br>Size, N | Inpatient          | Outpa-<br>tient  | Skilled<br>Nursing<br>Facility | Home<br>Health<br>Care/ Hos-<br>pice | Physician<br>Vis-<br>its/DME | Prescrip-<br>tion Drug<br>Fills | Total<br>Medicare   | LTC                | Total               |
|-------------------------|-------------------|--------------------|------------------|--------------------------------|--------------------------------------|------------------------------|---------------------------------|---------------------|--------------------|---------------------|
| Baseline period         |                   |                    |                  |                                |                                      |                              |                                 |                     |                    |                     |
| Mean (SD)               | 49,509            | 9989<br>(18,376)   | 2817<br>(5208)   | 7721<br>(15,845)               | 3279<br>(7638)                       | 5585<br>(6615)               | 4303<br>(4893)                  | 33,693<br>(36,360)  | 15,060<br>(30,429) | 48,753<br>(46,068)  |
| Adjusted mean           |                   | 9989               | 2817             | 7721                           | 3279                                 | 5585                         | 4303                            | 33,693              | 15,060             | 48,753              |
| 1 year post in-<br>dex  |                   |                    |                  |                                |                                      |                              |                                 |                     |                    |                     |
| Mean (SD)               | 49,509            | 25,982<br>(96,608) | 3731<br>(11,872) | 11,430<br>(31,105)             | 9901<br>(20,680)                     | 8588<br>(18,331)             | 5257<br>(5992)                  | 64,889<br>(123,792) | 24,495<br>(36,918) | 89,384<br>(125,116) |
| Adjusted mean           |                   | 11,779             | 3179             | 8534                           | 6709                                 | 5908                         | 5326                            | 41,433              | 26,270             | 67,704              |
| 2 years post in-<br>dex |                   |                    |                  |                                |                                      |                              |                                 |                     |                    |                     |
| Mean (SD)               | 26,808            | 11,971<br>(49,692) | 2775<br>(6228)   | 5157<br>(17,087)               | 8875<br>(18,563)                     | 5512<br>(10,773)             | 5010<br>(5751)                  | 39,300<br>(67,456)  | 29,136<br>(40,310) | 68,436<br>(74,816)  |
| Adjusted mean           |                   | 7357               | 2590             | 4584                           | 6698                                 | 4605                         | 5142                            | 30,975              | 30,634             | 61,609              |
| 3 years post in-<br>dex |                   |                    |                  |                                |                                      |                              |                                 |                     |                    |                     |
| Mean (SD)               | 16,027            | 10,882<br>(52,390) | 2616<br>(7040)   | 4455<br>(15,603)               | 8786<br>(18,710)                     | 5084<br>(10,103)             | 4828<br>(5940)                  | 36,651<br>(69,457)  | 32,235<br>(41,942) | 68,885<br>(77,064)  |
| Adjusted mean           |                   | 6429               | 2425             | 3880                           | 6762                                 | 4225                         | 4941                            | 28,662              | 33,756             | 62,417              |
| 4 years post in-<br>dex |                   |                    |                  |                                |                                      |                              |                                 |                     |                    |                     |
| Mean (SD)               | 9277              | 9914<br>(43,606)   | 2402<br>(5153)   | 3746<br>(14,124)               | 8878<br>(18,992)                     | 4709<br>(9359)               | 4653<br>(6199)                  | 34,302<br>(60,809)  | 34,838<br>(42,976) | 69,140<br>(69,635)  |
| Adjusted mean           |                   | 6045               | 2273             | 3310                           | 6837                                 | 3931                         | 4776                            | 27,171              | 36,645             | 63,816              |

All values are 2015 US dollars per patient per year. Abbreviation: DME=durable medical equipment; LTC=long-term care; SD=standard deviation.

**Table S6.** Psychosis-Related Costs Per Patient Per Year by Setting.

|                    | Sample Size, N | Inpatient        | Outpatient    | Skilled<br>Nursing Fa-<br>cility | Home<br>Health<br>Care/Hos-<br>pice | Physician<br>Visits/DME | Prescription<br>Drug Fills | Total            |
|--------------------|----------------|------------------|---------------|----------------------------------|-------------------------------------|-------------------------|----------------------------|------------------|
| Baseline period    |                |                  |               |                                  |                                     |                         |                            |                  |
| Mean (SD)          | 49,509         | 458<br>(2603)    | 57<br>(270)   | 150<br>(1329)                    | 26<br>(326)                         | 128<br>(224)            | 137<br>(538)               | 955<br>(3022)    |
| Weighted mean      |                | 458              | 57            | 150                              | 26                                  | 128                     | 137                        | 955              |
| 1 year post index  |                |                  |               |                                  |                                     |                         |                            |                  |
| Mean (SD)          | 49,509         | 2912<br>(38,279) | 156<br>(1827) | 1885<br>(13,022)                 | 559<br>(6336)                       | 356<br>(1803)           | 795<br>(1603)              | 6663<br>(41,597) |
| Weighted mean      |                | 1147             | 115           | 1237                             | 317                                 | 227                     | 782                        | 3824             |
| 2 years post index |                |                  |               |                                  |                                     |                         |                            |                  |
| Mean (SD)          | 26,808         | 319<br>(4814)    | 66<br>(689)   | 392<br>(5009)                    | 193<br>(3177)                       | 113<br>(537)            | 620<br>(1480)              | 1703<br>(8191)   |
| Weighted mean      |                | 256              | 68            | 356                              | 137                                 | 107                     | 642                        | 1565             |
| 3 years post index |                |                  |               |                                  |                                     |                         |                            |                  |
| Mean (SD)          | 16,027         | 226<br>(3588)    | 50<br>(480)   | 311<br>(4005)                    | 166<br>(2640)                       | 91<br>(499)             | 510<br>(1400)              | 1354<br>(6673)   |
| Weighted mean      |                | 206              | 52            | 292                              | 118                                 | 89                      | 523                        | 1280             |
| 4 years post index |                |                  |               |                                  |                                     |                         |                            |                  |
| Mean (SD)          | 9277           | 223<br>(3458)    | 54<br>(511)   | 202<br>(2711)                    | 122<br>(2267)                       | 77<br>(397)             | 399<br>(1284)              | 1077<br>(5494)   |
| Weighted mean      |                | 170              | 57            | 210                              | 116                                 | 73                      | 419                        | 1054             |

All values are 2015 US dollars per patient per year. Abbreviations: DME=durable medical equipment; SD=standard deviation.

**Table S7.** Annualized Psychosis-related Weighted HCRU Claims Per Patient Per Year for Patients With Dementia-related Psychosis.

|                         | <b>Sample<br/>Size, N</b> | <b>Inpatient</b> | <b>Emergency<br/>Department/<br/>Observation<br/>Stay</b> | <b>Outpatient<sup>1</sup></b> | <b>Skilled<br/>Nursing Fa-<br/>cility</b> | <b>Home Health<br/>Care/ Hos-<br/>pice</b> | <b>Physician<br/>Visits/DME</b> | <b>Prescription<br/>Drug Fills</b> |
|-------------------------|---------------------------|------------------|-----------------------------------------------------------|-------------------------------|-------------------------------------------|--------------------------------------------|---------------------------------|------------------------------------|
| Baseline period         | 49,509                    | 0.07             | 0.04                                                      | 0.14                          | 0.05                                      | 0.02                                       | 0.77                            | 2.11                               |
| 1 year post index       | 49,509                    | 0.05             | 0.02                                                      | 0.21                          | 0.17                                      | 0.07                                       | 1.60                            | 7.64                               |
| 2 years post in-<br>dex | 26,808                    | 0.02             | 0.01                                                      | 0.15                          | 0.08                                      | 0.04                                       | 0.94                            | 6.49                               |
| 3 years post in-<br>dex | 16,027                    | 0.02             | 0.01                                                      | 0.12                          | 0.08                                      | 0.03                                       | 0.82                            | 5.80                               |
| 4 years post in-<br>dex | 9277                      | 0.01             | 0.01                                                      | 0.13                          | 0.06                                      | 0.03                                       | 0.69                            | 5.25                               |

Weighted mean values are shown. <sup>1</sup> Outpatient setting does not include emergency department or observation hospital stays. Abbreviation: DME=durable medical equipment; LTC=long-term care; SD=standard deviation.

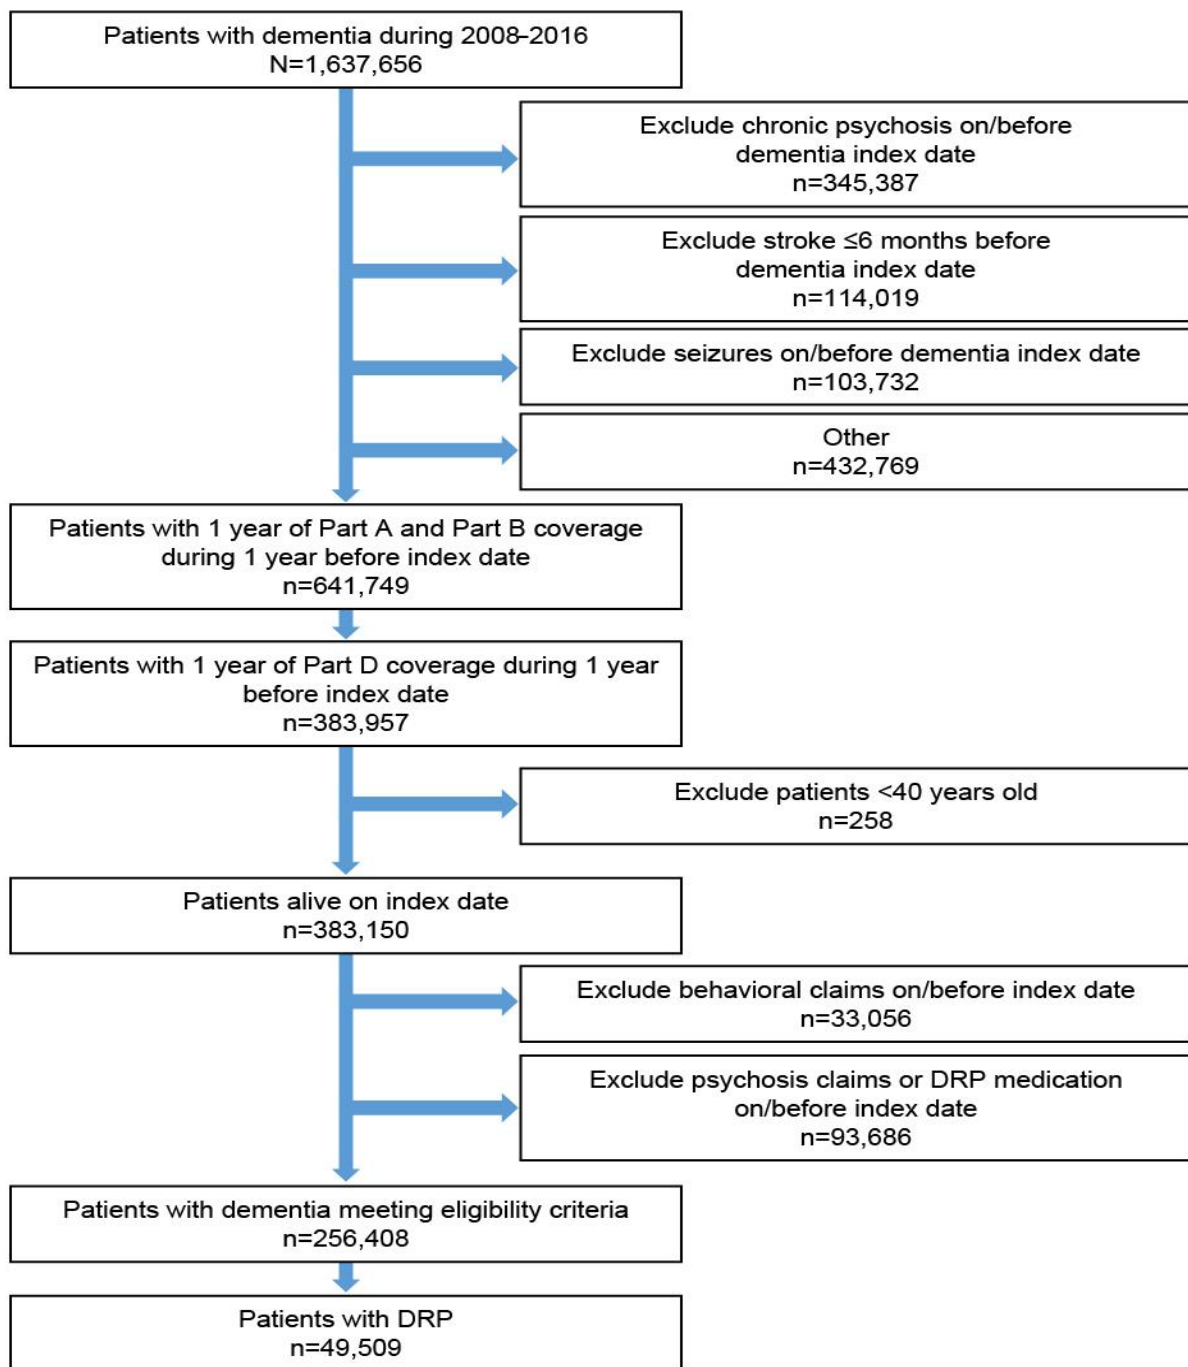

**Figure S1.** Patient Selection. Abbreviation: DRP=dementia-related psychosis.
